# Supplementary material for: Obesogenic Diet in Mice Leads to Inflammation and Oxidative Stress in the Mother in Association with Sex-Specific Changes in Fetal Development, Inflammatory Markers and Placental Transcriptome
Source: MDPI journal article supplement (doi:10.3390/antiox13040411), 2024-03-28
Supplement: s1 [file s1]

## Supplementary Materials

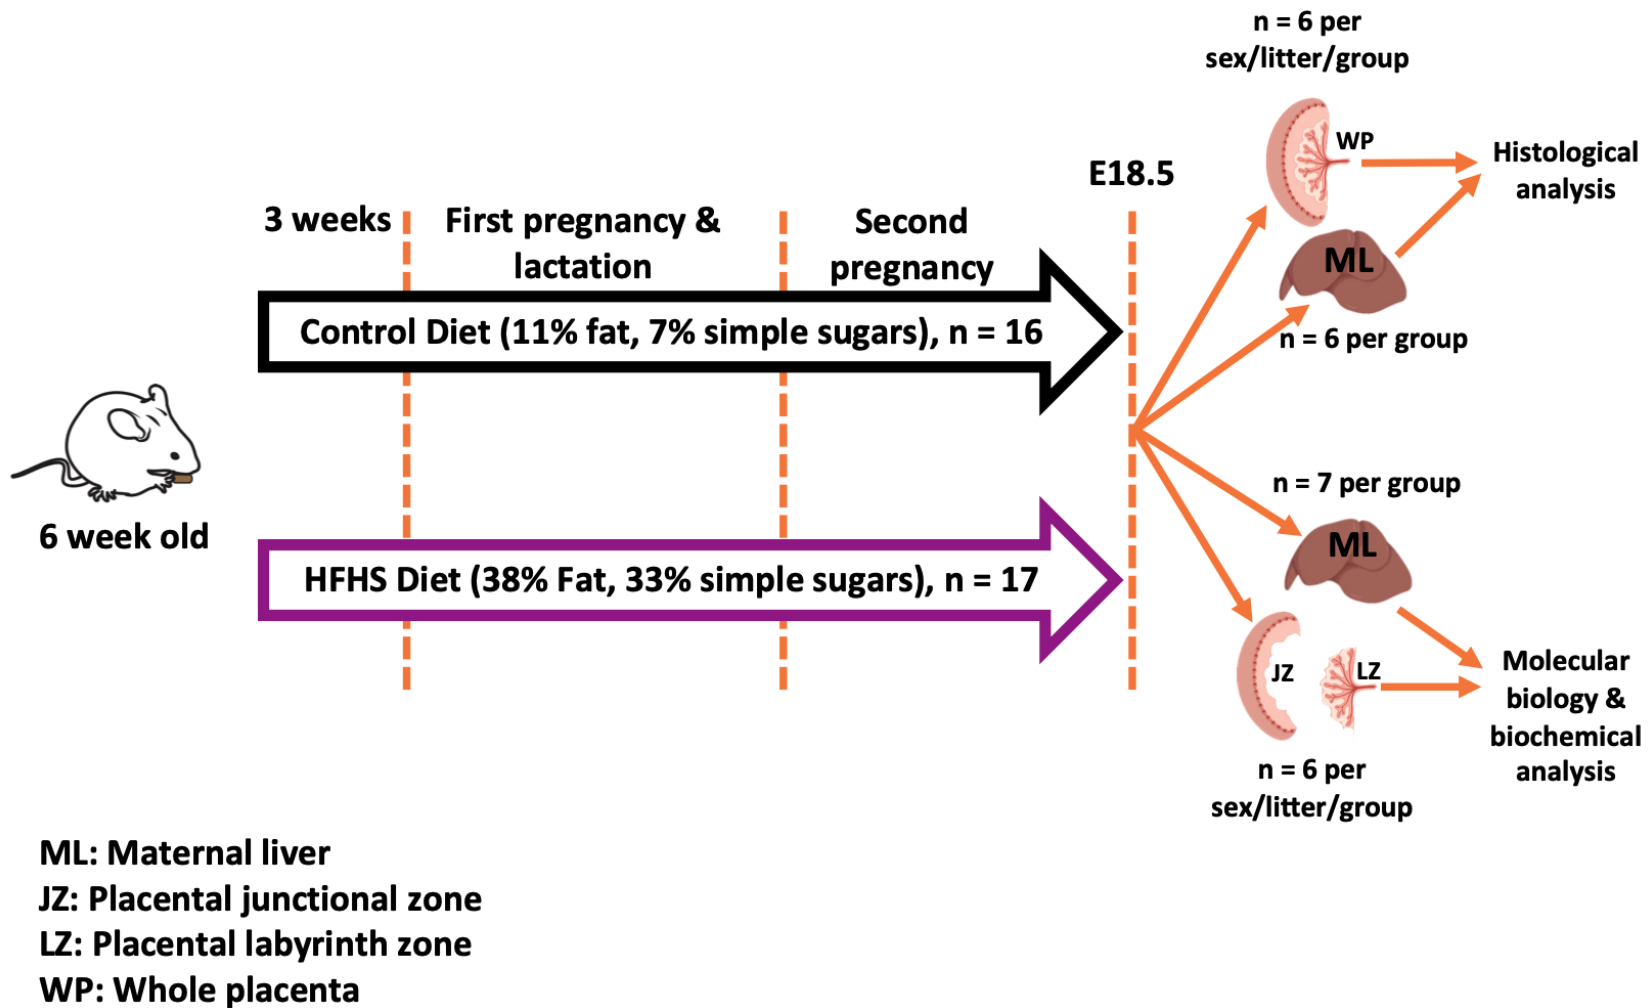

Figure S1. Study design.

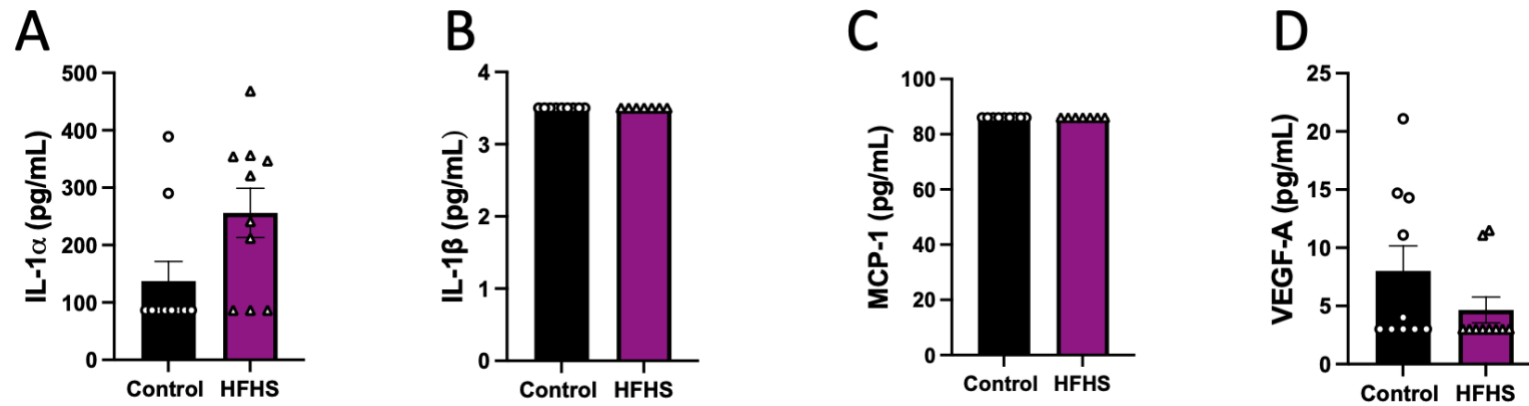

**Figure S2. Maternal cytokines below detectable levels of the assay.**

Plasma maternal levels of IL-1 $\alpha$  (A), IL-1 $\beta$  (B), MCP-1 (C), and VEGF-A (D). Groups are controlled (Control, black bars, circles n=10) and high-fat high-sugar diet (HFHS, magenta bars, triangles, n=10). Statistical analysis was not performed due to the under-detection of most of the cytokines.

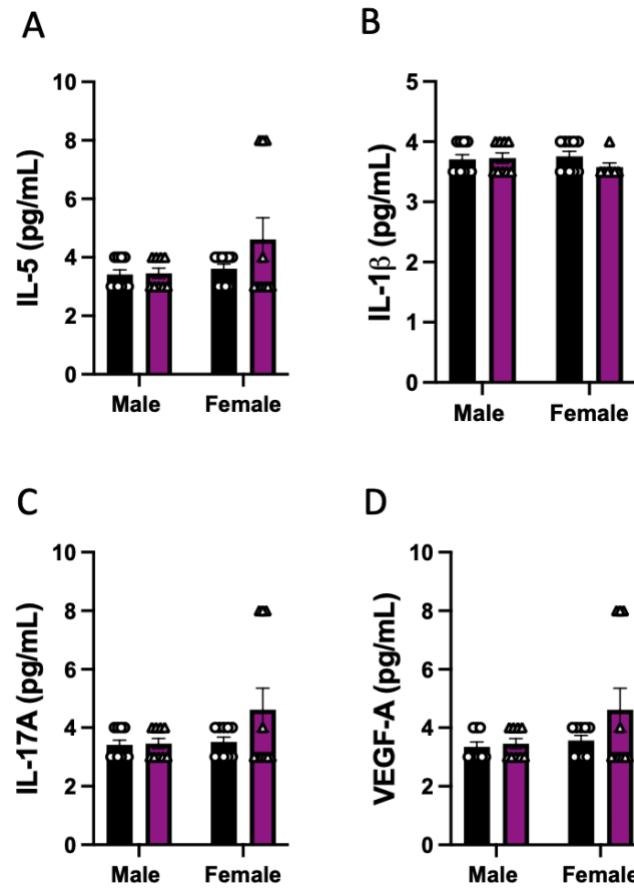

**Figure S3. Fetal cytokines below detectable levels of the assay.**

Plasma fetal levels of IL-5 (A), IL- $\beta$  (B), IL-17A (C) and VEGF-A (D). Groups are controlled (Control, black bars, circles n=10) and high-fat high-sugar diet (HFHS, magenta bars, triangles, n=10). Statistical analysis was not performed due to the under-detection of most of the cytokines.

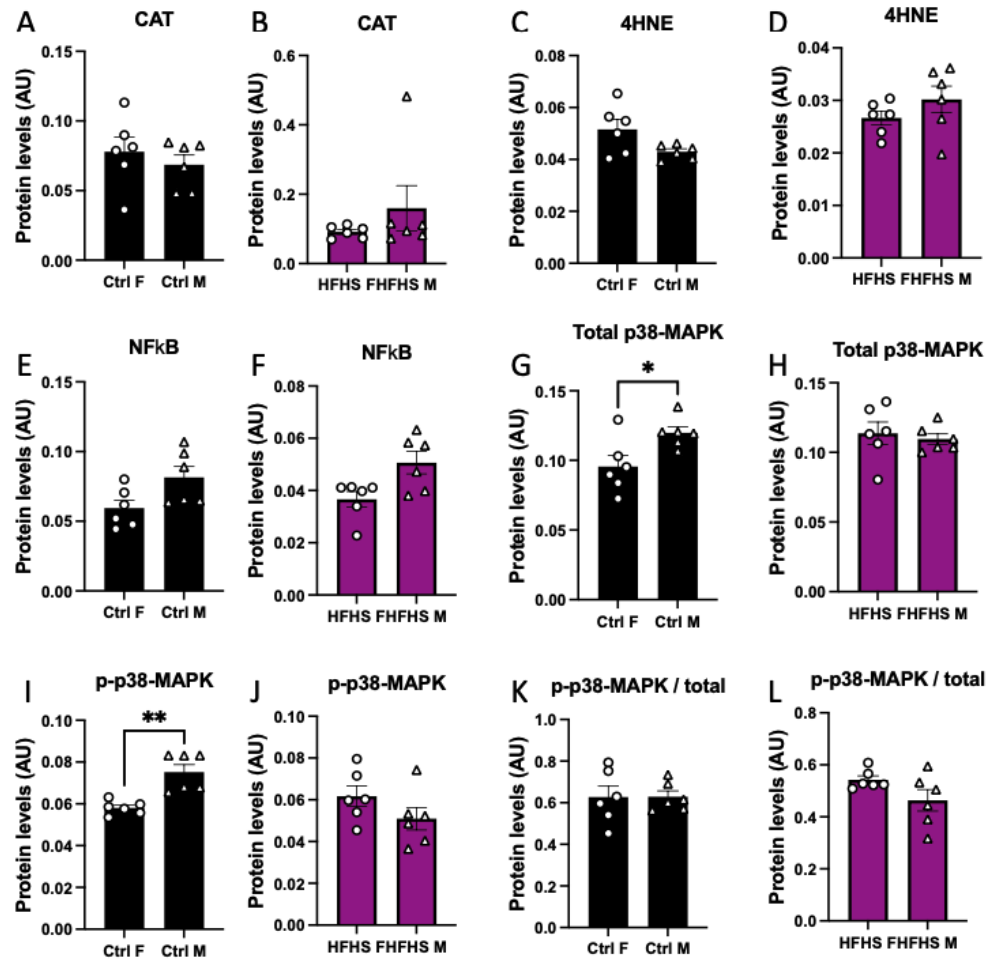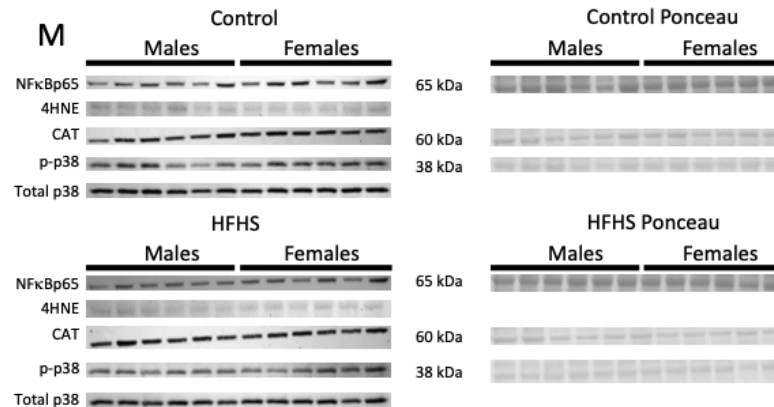

**Figure S4. Placental labyrinth zone protein levels – Comparison by sex.**

Protein levels of catalase (CAT, A-B), 4-Hydroxynonenal (4-HNE, C-D), total levels of p65-NF $\kappa$ B (E-F), total p38 (G-H), phosphorylated p38 (I-J), phosphorylated to total p38 (K-L) and representative image of western blots (M) from placental labyrinth zone of control (Ctrl F, Ctrl M,) and HFHS (HFHS M, HFHS M) are shown. Groups are control (Control, black bars, circles, n=6) and high-fat high-sugar diet (HFHS, magenta bars, triangles, n=6). Each dot represents one individual. Mean  $\pm$  SEM is shown. Rout test was applied to identify outliers and Shapiro-Wilk to determine the normality of data. Data was submitted to the t-Student test or Mann-Whitney according to data distribution. \*p $\leq$ 0.05 vs. female; \*\*p $\leq$ 0.005 vs. female.

**Table S1. Gene Identification**

| Gene ID            | Gene Symbol   |                    |          |                    |         |
|--------------------|---------------|--------------------|----------|--------------------|---------|
| ENSMUSG00000026051 | 1500015O10Rik | ENSMUSG00000040828 | Catsperd | ENSMUSG00000093507 | Gm20627 |
| ENSMUSG00000051606 | 2010001K21Rik | ENSMUSG00000045790 | Ccdc149  | ENSMUSG00000079323 | Gm20661 |
| ENSMUSG00000085287 | 4833418N02Rik | ENSMUSG00000039155 | Cdh26    | ENSMUSG00000090625 | Gm20721 |
| ENSMUSG00000025783 | 4930412O13Rik | ENSMUSG00000034918 | Cdhr2    | ENSMUSG00000092225 | Gm2381  |
| ENSMUSG00000097494 | 4933406C10Rik | ENSMUSG00000040809 | Chil3    | ENSMUSG00000099143 | Gm27483 |
| ENSMUSG00000101848 | 4933417E11Rik | ENSMUSG00000037594 | Clba1    | ENSMUSG00000098816 | Gm27786 |
| ENSMUSG00000110140 | 5430421F17Rik | ENSMUSG00000063564 | Col23a1  | ENSMUSG00000113252 | Gm33489 |
| ENSMUSG00000113831 | AC163032.1    | ENSMUSG00000004415 | Col26a1  | ENSMUSG00000102411 | Gm36936 |
| ENSMUSG00000032281 | Acsbg1        | ENSMUSG00000036731 | Cysrt1   | ENSMUSG00000103050 | Gm38273 |
| ENSMUSG00000044017 | Adgrd1        | ENSMUSG00000031970 | Dbnidd1  | ENSMUSG00000112474 | Gm46209 |
| ENSMUSG00000015452 | Ager          | ENSMUSG00000028078 | Dclk2    | ENSMUSG00000112922 | Gm47572 |
| ENSMUSG00000033715 | Akr1c14       | ENSMUSG00000059327 | Eda      | ENSMUSG00000115593 | Gm4824  |
| ENSMUSG00000039062 | Anpep         | ENSMUSG00000048988 | Elfn1    | ENSMUSG00000112963 | Gm6093  |
| ENSMUSG00000044338 | Aplnr         | ENSMUSG00000032262 | Elovl4   | ENSMUSG00000113428 | Gm7664  |
| ENSMUSG00000090698 | Apold1        | ENSMUSG00000022468 | Endou    | ENSMUSG00000114155 | Gm7986  |
| ENSMUSG00000038204 | Asb10         | ENSMUSG00000028024 | Enpep    | ENSMUSG00000089901 | Gm8113  |
| ENSMUSG00000039200 | Atf7ip2       | ENSMUSG00000113346 | Eprn     | ENSMUSG00000046733 | Gprc5a  |
| ENSMUSG00000039347 | Atp6v0e2      | ENSMUSG00000037709 | Fam13a   | ENSMUSG00000050440 | Hamp    |
| ENSMUSG00000079065 | BC005561      | ENSMUSG00000078670 | Fam174b  | ENSMUSG00000056758 | Hmga2   |
| ENSMUSG00000112160 | BC024063      | ENSMUSG00000025854 | Fam20c   | ENSMUSG00000029919 | Hpgds   |
| ENSMUSG00000105345 | BC030343      | ENSMUSG00000025738 | Fbxl16   | ENSMUSG00000001249 | Hpn     |
| ENSMUSG00000028167 | Bdh2          | ENSMUSG00000024827 | Gldc     | ENSMUSG00000023046 | Igfbp6  |
| ENSMUSG00000095742 | CAA01147332.1 | ENSMUSG00000087086 | Gm13269  | ENSMUSG00000095079 | Igha    |
| ENSMUSG00000020866 | Cacna1g       | ENSMUSG00000079009 | Gm14139  | ENSMUSG00000076609 | Igkc    |
| ENSMUSG00000054793 | Cadm4         | ENSMUSG00000085524 | Gm14224  | ENSMUSG00000006538 | Ihh     |
| ENSMUSG00000054083 | Capn12        | ENSMUSG00000090015 | Gm15446  | ENSMUSG00000027399 | Il1a    |
|                    |               | ENSMUSG00000107181 | Gm17768  | ENSMUSG00000030330 | Ing4    |

|                    |          |                    |            |                    |               |
|--------------------|----------|--------------------|------------|--------------------|---------------|
| ENSMUSG00000050671 | Ism2     | ENSMUSG00000005268 | Prlr       | ENSMUSG00000014846 | Tppp3         |
| ENSMUSG00000067149 | Jchain   | ENSMUSG00000093565 | Rab26os    | ENSMUSG00000056596 | Trnp1         |
| ENSMUSG00000025221 | Kcnp2    | ENSMUSG00000049404 | Rarres1    | ENSMUSG00000026202 | Tuba4a        |
| ENSMUSG00000002908 | Kcnn1    | ENSMUSG00000027347 | Rasgrp1    | ENSMUSG00000031380 | Vegfd         |
| ENSMUSG00000050463 | Krt78    | ENSMUSG00000034209 | Rasl10a    | ENSMUSG00000068231 | Vmn1r43       |
| ENSMUSG00000015882 | Lcorl    | ENSMUSG00000037962 | Rflna      | ENSMUSG00000025082 | Vwa2          |
| ENSMUSG00000050966 | Lin28a   | ENSMUSG00000024206 | Rfx2       | ENSMUSG00000037989 | Wnk2          |
| ENSMUSG00000078952 | Lncenc1  | ENSMUSG00000038530 | Rgs4       | ENSMUSG00000036856 | Wnt4          |
| ENSMUSG00000025185 | Loxl4    | ENSMUSG00000081895 | Rpl17-ps10 | ENSMUSG00000074578 | Zfas1         |
| ENSMUSG00000045045 | Lrfn4    | ENSMUSG00000096699 | Rps19-ps4  | ENSMUSG00000029813 | 1600015I10Rik |
| ENSMUSG00000001802 | Lrp3     | ENSMUSG00000047735 | Samd9l     | ENSMUSG00000071103 | 1700029J07Rik |
| ENSMUSG00000040533 | Matn1    | ENSMUSG00000046229 | Scand1     | ENSMUSG00000055833 | 1700034H15Rik |
| ENSMUSG00000053702 | Nabl     | ENSMUSG00000025203 | Scd2       | ENSMUSG00000027327 | 1700037H04Rik |
| ENSMUSG00000036902 | Neto2    | ENSMUSG00000007279 | Scube2     | ENSMUSG00000097412 | 1810014B01Rik |
| ENSMUSG00000042988 | Notum    | ENSMUSG00000040569 | Slc26a7    | ENSMUSG00000020812 | 1810032O08Rik |
| ENSMUSG00000051228 | Nyx      | ENSMUSG00000035699 | Slc51a     | ENSMUSG00000100680 | 1810044D09Rik |
| ENSMUSG00000021390 | Ogn      | ENSMUSG00000031089 | Slc6a14    | ENSMUSG00000042041 | 2010003K11Rik |
| ENSMUSG00000029718 | Pcolce   | ENSMUSG00000022180 | Slc7a8     | ENSMUSG00000063522 | 2010109I03Rik |
| ENSMUSG00000000489 | Pdgfb    | ENSMUSG00000037994 | Slc9b2     | ENSMUSG00000097536 | 2610037D02Rik |
| ENSMUSG00000032105 | Pdzd3    | ENSMUSG00000001761 | Smo        | ENSMUSG00000101731 | 3830432H09Rik |
| ENSMUSG00000028716 | Pdzk1ip1 | ENSMUSG00000108414 | Snhg1      | ENSMUSG00000107402 | 4732416N19Rik |
| ENSMUSG00000027674 | Pex5l    | ENSMUSG00000027488 | Snta1      | ENSMUSG00000090031 | 4732440D04Rik |
| ENSMUSG00000024738 | Pga5     | ENSMUSG00000053030 | Spink2     | ENSMUSG00000072762 | 4930522L14Rik |
| ENSMUSG00000041801 | Phlda3   | ENSMUSG00000036928 | Stag3      | ENSMUSG00000072893 | 4933439C10Rik |
| ENSMUSG00000040543 | Pitpnm3  | ENSMUSG00000038576 | Susd4      | ENSMUSG00000116145 | 5730521K06Rik |
| ENSMUSG00000021506 | Pitx1    | ENSMUSG00000046694 | Tent5b     | ENSMUSG00000097375 | 6720427I07Rik |
| ENSMUSG00000056220 | Pla2g4a  | ENSMUSG00000035686 | Thrsp      | ENSMUSG00000072982 | 9230009I02Rik |
| ENSMUSG00000003282 | Plag1    | ENSMUSG00000091898 | Tnnc1      | ENSMUSG00000038884 | A230050P20Rik |
| ENSMUSG00000045731 | Pnoc     | ENSMUSG00000021573 | Tppp       | ENSMUSG00000096929 | A330023F24Rik |

|                     |               |
|---------------------|---------------|
| ENSMUSG00000097124  | A530020G20Rik |
| ENSMUSG00000101013  | A630072M18Rik |
| ENSMUSG00000116673  | A630089N07Rik |
| ENSMUSG00000032735  | Ablim3        |
| ENSMUSG00000032724  | Abtb2         |
| ENSMUSG00000116594  | AC133488.1    |
| ENSMUSG00000116813  | AC140300.3    |
| ENSMUSG00000116908  | AC154232.2    |
| ENSMUSG00000117333  | AC154486.3    |
| ENSMUSG00000111394  | AC160637.1    |
| ENSMUSG00000030935  | Acsn3         |
| ENSMUSG00000040537  | Adam22        |
| ENSMUSG00000018500  | Adora2b       |
| ENSMUSG00000090086  | AI480526      |
| ENSMUSG00000078247  | Airn          |
| ENSMUSG00000061603  | Akap6         |
| ENSMUSG00000063810  | Alms1         |
| ENSMUSG00000037907  | Ankrd13b      |
| ENSMUSG00000050914  | Ankrd37       |
| ENSMUSG00000005681  | Apoa2         |
| ENSMUSG00000002985  | Apoe          |
| ENSMUSG00000038295  | Atg9b         |
| ENSMUSG00000108461  | AV356131      |
| ENSMUSG00000085133  | B930095G15Rik |
| ENSMUSG00000040605  | Bace2         |
| ENSMUSG000000051444 | Bbs12         |
| ENSMUSG00000060149  | BC002059      |
| ENSMUSG00000000706  | Btn1a1        |
| ENSMUSG00000063623  | C230062I16Rik |

|                    |                |
|--------------------|----------------|
| ENSMUSG00000063897 | CAAA01118383.1 |
| ENSMUSG0000006056  | Calcoco2       |
| ENSMUSG00000038128 | Camk4          |
| ENSMUSG00000049676 | Catsperg1      |
| ENSMUSG00000040525 | Cblc           |
| ENSMUSG00000028689 | Ccdc163        |
| ENSMUSG00000029875 | Ccdc184        |
| ENSMUSG00000043923 | Ccdc84         |
| ENSMUSG00000047810 | Ccdc88b        |
| ENSMUSG00000027715 | Ccna2          |
| ENSMUSG00000026012 | Cd28           |
| ENSMUSG00000032595 | Cdhr4          |
| ENSMUSG00000056501 | Cebpb          |
| ENSMUSG00000060402 | Chst8          |
| ENSMUSG00000023906 | Cldn6          |
| ENSMUSG00000030157 | Clec2d         |
| ENSMUSG00000026034 | Clk1           |
| ENSMUSG00000020953 | Coch           |
| ENSMUSG00000058806 | Col13a1        |
| ENSMUSG00000028626 | Col9a2         |
| ENSMUSG00000027570 | Col9a3         |
| ENSMUSG00000025196 | Cpn1           |
| ENSMUSG00000024008 | Cpne5          |
| ENSMUSG00000036596 | Cpz            |
| ENSMUSG00000027230 | Creb3l1        |
| ENSMUSG00000035041 | Creb3l3        |
| ENSMUSG00000023272 | Creld2         |
| ENSMUSG00000106106 | CT010467.1     |
| ENSMUSG00000052336 | Cx3cr1         |

|                    |               |
|--------------------|---------------|
| ENSMUSG00000048065 | Cyb5r2        |
| ENSMUSG00000106820 | D5Ertd605e    |
| ENSMUSG00000007039 | Ddah2         |
| ENSMUSG00000015377 | Dennd6b       |
| ENSMUSG00000048489 | Depp1         |
| ENSMUSG00000009092 | Derl3         |
| ENSMUSG00000009145 | Dqx1          |
| ENSMUSG00000040415 | Dtx3          |
| ENSMUSG00000028601 | Echdc2        |
| ENSMUSG00000003410 | Elavl3        |
| ENSMUSG00000029675 | Eln           |
| ENSMUSG00000028664 | Ephb2         |
| ENSMUSG00000050248 | Evc2          |
| ENSMUSG00000052125 | F730043M19Rik |
| ENSMUSG00000033799 | Fam208b       |
| ENSMUSG00000020614 | Fam20a        |
| ENSMUSG00000024598 | Fbn2          |
| ENSMUSG00000021974 | Fgf9          |
| ENSMUSG00000085396 | Firre         |
| ENSMUSG00000020635 | Fkbp1b        |
| ENSMUSG00000047787 | Flrt1         |
| ENSMUSG00000041559 | Fmod          |
| ENSMUSG00000008200 | Fnbp4         |
| ENSMUSG00000097694 | G730013B05Rik |
| ENSMUSG00000024462 | Gabbr1        |
| ENSMUSG00000031340 | Gabre         |
| ENSMUSG00000023267 | Gabbr2        |
| ENSMUSG00000096954 | Gdap10        |
| ENSMUSG00000030703 | Gdpd3         |



|                    |         |
|--------------------|---------|
| ENSMUSG00000048582 | Gja3    |
| ENSMUSG00000057123 | Gja5    |
| ENSMUSG00000031163 | Glod5   |
| ENSMUSG00000060730 | Gm10086 |
| ENSMUSG00000066116 | Gm10154 |
| ENSMUSG00000073985 | Gm10602 |
| ENSMUSG00000097773 | Gm10614 |
| ENSMUSG00000074284 | Gm10658 |
| ENSMUSG00000085152 | Gm11496 |
| ENSMUSG00000072915 | Gm12258 |
| ENSMUSG00000087142 | Gm12454 |
| ENSMUSG00000100514 | Gm12960 |
| ENSMUSG00000085767 | Gm13563 |
| ENSMUSG00000082196 | Gm14231 |
| ENSMUSG00000081865 | Gm15484 |
| ENSMUSG00000085917 | Gm15899 |
| ENSMUSG00000086287 | Gm15972 |
| ENSMUSG00000087381 | Gm16008 |
| ENSMUSG00000089769 | Gm16574 |
| ENSMUSG00000097042 | Gm17491 |
| ENSMUSG00000101599 | Gm20342 |
| ENSMUSG00000065767 | Gm23849 |
| ENSMUSG00000076258 | Gm23935 |
| ENSMUSG00000097730 | Gm26588 |
| ENSMUSG00000101603 | Gm28730 |
| ENSMUSG00000096218 | Gm2916  |
| ENSMUSG00000109179 | Gm35339 |
| ENSMUSG00000079584 | Gm364   |
| ENSMUSG00000112991 | Gm36635 |

|                    |         |
|--------------------|---------|
| ENSMUSG00000104344 | Gm38077 |
| ENSMUSG00000103509 | Gm38372 |
| ENSMUSG00000108010 | Gm38708 |
| ENSMUSG00000106022 | Gm42929 |
| ENSMUSG00000105677 | Gm43328 |
| ENSMUSG00000107096 | Gm43597 |
| ENSMUSG00000104546 | Gm43858 |
| ENSMUSG00000107876 | Gm43936 |
| ENSMUSG00000109390 | Gm45718 |
| ENSMUSG00000109836 | Gm45884 |
| ENSMUSG00000097750 | Gm4673  |
| ENSMUSG00000114185 | Gm47662 |
| ENSMUSG00000109378 | Gm49396 |
| ENSMUSG00000024869 | Gm49405 |
| ENSMUSG00000111290 | Gm5122  |
| ENSMUSG00000098050 | Gm5345  |
| ENSMUSG00000062461 | Gm5453  |
| ENSMUSG00000108366 | Gm5586  |
| ENSMUSG00000101834 | Gm5829  |
| ENSMUSG00000097937 | Gm6967  |
| ENSMUSG00000099843 | Gm7160  |
| ENSMUSG00000105408 | Gm7285  |
| ENSMUSG00000055771 | Gm7936  |
| ENSMUSG00000062458 | Gm8623  |
| ENSMUSG00000097906 | Gm9625  |
| ENSMUSG00000115483 | Gm9732  |
| ENSMUSG00000048240 | Gng7    |
| ENSMUSG00000039720 | Got1l1  |
| ENSMUSG00000029510 | Gpc2    |

|                    |           |
|--------------------|-----------|
| ENSMUSG00000055653 | Gpc3      |
| ENSMUSG00000058396 | Gpr182    |
| ENSMUSG00000045281 | Gpr20     |
| ENSMUSG00000021095 | Gsc       |
| ENSMUSG00000107369 | Gstm2-ps1 |
| ENSMUSG00000041624 | Gucy1a2   |
| ENSMUSG00000027360 | Hdc       |
| ENSMUSG00000039307 | Hexdc     |
| ENSMUSG00000069270 | Hist1h2ac |
| ENSMUSG00000047246 | Hist1h2be |
| ENSMUSG00000068854 | Hist2h2be |
| ENSMUSG00000017950 | Hnf4a     |
| ENSMUSG00000001655 | Hoxc13    |
| ENSMUSG00000078915 | Hsp25-ps1 |
| ENSMUSG00000020048 | Hsp90b1   |
| ENSMUSG00000026864 | Hspa5     |
| ENSMUSG00000006205 | Htra1     |
| ENSMUSG00000031838 | Ifi30     |
| ENSMUSG00000020429 | Igfbp1    |
| ENSMUSG00000070427 | Il18bp    |
| ENSMUSG00000056899 | Immp2l    |
| ENSMUSG00000035270 | Impg2     |
| ENSMUSG00000037206 | Islr      |
| ENSMUSG00000090210 | Itga10    |
| ENSMUSG00000026768 | Itga8     |
| ENSMUSG00000087149 | Itih5l-ps |
| ENSMUSG00000055862 | Izumo4    |
| ENSMUSG00000048534 | Jaml      |
| ENSMUSG00000079056 | Kcnp3     |

|                    |         |
|--------------------|---------|
| ENSMUSG00000046410 | Kcnk6   |
| ENSMUSG00000067750 | Khdc1a  |
| ENSMUSG00000004187 | Kifc2   |
| ENSMUSG00000038056 | Kmt2c   |
| ENSMUSG00000035545 | Leng8   |
| ENSMUSG00000043501 | Lgals2  |
| ENSMUSG00000053964 | Lgals4  |
| ENSMUSG00000053846 | Lipg    |
| ENSMUSG00000025500 | Lmntd2  |
| ENSMUSG00000009356 | Lpo     |
| ENSMUSG00000036957 | Lrfn3   |
| ENSMUSG00000026443 | Lrrn2   |
| ENSMUSG00000001870 | Ltbp1   |
| ENSMUSG00000002020 | Ltbp2   |
| ENSMUSG00000024940 | Ltbp3   |
| ENSMUSG00000020377 | Ltc4s   |
| ENSMUSG00000034041 | Lyl1    |
| ENSMUSG00000030041 | M1ap    |
| ENSMUSG00000031303 | Map3k15 |
| ENSMUSG00000021268 | Meg3    |
| ENSMUSG00000041921 | Metap1d |
| ENSMUSG00000002274 | Metrn   |
| ENSMUSG00000097391 | Mirg    |
| ENSMUSG00000041445 | Mmrn2   |
| ENSMUSG00000073414 | Mpig6b  |
| ENSMUSG00000029918 | Mrps33  |
| ENSMUSG00000007035 | Msh5    |
| ENSMUSG00000021815 | Mss51   |
| ENSMUSG00000031200 | Mtcp1   |

|                    |          |
|--------------------|----------|
| ENSMUSG00000057280 | Musk     |
| ENSMUSG00000046916 | Myct1    |
| ENSMUSG00000034906 | Ncaph    |
| ENSMUSG00000023087 | Noct     |
| ENSMUSG00000030562 | Nox4     |
| ENSMUSG00000022421 | Nptxr    |
| ENSMUSG00000029605 | Oas1b    |
| ENSMUSG00000047094 | Ofcc1    |
| ENSMUSG00000034160 | Ogt      |
| ENSMUSG00000027848 | Olfml3   |
| ENSMUSG00000051048 | P4ha3    |
| ENSMUSG00000022194 | Pabpn1   |
| ENSMUSG00000037196 | Pacrg    |
| ENSMUSG00000032278 | Paqr5    |
| ENSMUSG00000022033 | Pbk      |
| ENSMUSG00000038370 | Pcp4l1   |
| ENSMUSG00000020131 | Pcsk4    |
| ENSMUSG00000023987 | Pgc      |
| ENSMUSG00000031295 | Phka2    |
| ENSMUSG00000010760 | Phlda2   |
| ENSMUSG00000024011 | Pi16     |
| ENSMUSG00000082286 | Pisd-ps1 |
| ENSMUSG00000033526 | Ppip5k1  |
| ENSMUSG00000015474 | Ppt2     |
| ENSMUSG00000019756 | Prl8a1   |
| ENSMUSG00000027376 | Prom2    |
| ENSMUSG00000074925 | Ptar1    |
| ENSMUSG00000034117 | Ptgd2    |
| ENSMUSG00000028036 | Ptgfr    |

|                    |             |
|--------------------|-------------|
| ENSMUSG00000045826 | Ptprcap     |
| ENSMUSG00000026204 | Ptprn       |
| ENSMUSG00000029449 | Rhof        |
| ENSMUSG00000097451 | Rian        |
| ENSMUSG00000028139 | Riad1       |
| ENSMUSG00000037386 | Rims2       |
| ENSMUSG00000116090 | Rpl19-ps6   |
| ENSMUSG00000051723 | Rpl31-ps13  |
| ENSMUSG00000044199 | S1pr4       |
| ENSMUSG00000022769 | Sdf2l1      |
| ENSMUSG00000057969 | Sema3b      |
| ENSMUSG00000058153 | Sez6l       |
| ENSMUSG00000029321 | Slc10a6     |
| ENSMUSG00000023829 | Slc22a1     |
| ENSMUSG00000022199 | Slc22a17    |
| ENSMUSG00000034248 | Slc25a37    |
| ENSMUSG00000085028 | Slc2a4rg-ps |
| ENSMUSG00000026791 | Slc2a8      |
| ENSMUSG00000005802 | Slc30a4     |
| ENSMUSG00000011034 | Slc5a1      |
| ENSMUSG00000030769 | Slc5a11     |
| ENSMUSG00000014786 | Slc9a5      |
| ENSMUSG00000050150 | Slc9b1      |
| ENSMUSG00000085385 | Snhg17      |
| ENSMUSG00000086859 | Snhg20      |
| ENSMUSG00000085241 | Snhg3       |
| ENSMUSG00000080316 | Spaca6      |
| ENSMUSG00000020867 | Spata20     |
| ENSMUSG00000033594 | Spata2l     |

|                    |         |                    |           |                    |         |
|--------------------|---------|--------------------|-----------|--------------------|---------|
| ENSMUSG00000051457 | Spn     | ENSMUSG00000042854 | Trp53rkb  | ENSMUSG00000034265 | Zdhhc14 |
| ENSMUSG00000067889 | Sptbn2  | ENSMUSG00000029868 | Trpv6     | ENSMUSG00000034163 | Zfc3h1  |
| ENSMUSG00000071112 | Spx     | ENSMUSG00000039021 | Ttc16     | ENSMUSG00000074731 | Zfp345  |
| ENSMUSG00000060445 | Sycp2   | ENSMUSG00000085873 | Ttc39aos1 | ENSMUSG00000000552 | Zfp385a |
| ENSMUSG00000031098 | Syt8    | ENSMUSG00000030276 | Ttll3     | ENSMUSG00000024276 | Zfp397  |
| ENSMUSG00000031939 | Taf1d   | ENSMUSG00000032596 | Uba7      | ENSMUSG00000061371 | Zfp873  |
| ENSMUSG00000052031 | Tagap1  | ENSMUSG00000043592 | Unc5cl    | ENSMUSG00000030424 | Zfp939  |
| ENSMUSG00000021187 | Tc2n    | ENSMUSG00000034911 | Ushbp1    | ENSMUSG00000096696 | Zfp960  |
| ENSMUSG00000009628 | Tex15   | ENSMUSG00000022382 | Wnt7b     | ENSMUSG00000078866 | Zfp970  |
| ENSMUSG00000078922 | Tgtp1   | ENSMUSG00000073125 | Xlr3b     | ENSMUSG00000034949 | Zfr2    |
| ENSMUSG00000034771 | Tle2    | ENSMUSG00000067768 | Xlr4b     | ENSMUSG00000073062 | Zxdb    |
| ENSMUSG00000024245 | Tmem178 | ENSMUSG00000031362 | Xlr4c     |                    |         |

**Table S2. Biological process of interest for genes upregulated by a maternal HFHS diet (overall, female-specific and male-specific comparisons).** Biological processes determined by the DAVID analysis tool and the comparison when altered are shown for upregulated genes related to immune response, lipid or fatty acid metabolic process, response to hypoxia & ROS, iron transport, nutrients transport, and angiogenesis. Data are n = 12 per dietary group for overall and n = 6 per group for sex-specific comparisons.

|                  | Biological process related to: |                                       |                           |               |                     |              | Altered when comparing Ctrl vs HFHS: |         |       |
|------------------|--------------------------------|---------------------------------------|---------------------------|---------------|---------------------|--------------|--------------------------------------|---------|-------|
| Upregulated DEGs | Immune response                | Lipid or fatty acid metabolic process | Response to hypoxia & ROS | Ion transport | Nutrients transport | Angiogenesis | Overall                              | Females | Males |
| Chil3            | x                              |                                       |                           |               |                     |              | Yes                                  | Yes     | Yes   |
| Pla2g4a          | x                              | x                                     |                           |               |                     |              | Yes                                  | Yes     | Yes   |
| Slc9b2           |                                |                                       |                           | x             |                     |              | Yes                                  | Yes     | Yes   |
| Bdh2             |                                | x                                     |                           |               |                     |              | Yes                                  | Yes     | No    |
| Slc26a7          |                                |                                       |                           | x             |                     |              | Yes                                  | Yes     | No    |
| Slc6a14          |                                |                                       |                           | x             |                     |              | Yes                                  | Yes     | No    |
| Cd28             | x                              |                                       |                           |               |                     |              | Yes                                  | No      | No    |
| Rasgrp1          | x                              |                                       |                           |               |                     |              | Yes                                  | No      | Yes   |
| Tgtp1            | x                              |                                       |                           |               |                     |              | Yes                                  | No      | No    |
| Hamp             | x                              |                                       |                           | x             |                     |              | Yes                                  | No      | Yes   |
| Il1a             | x                              |                                       |                           |               |                     |              | Yes                                  | No      | Yes   |
| Snhg1            | x                              |                                       |                           |               |                     |              | Yes                                  | No      | Yes   |
| Apold1           |                                | x                                     | x                         |               | x                   | x            | Yes                                  | No      | Yes   |
| Cyb5r2           |                                | x                                     |                           |               |                     |              | Yes                                  | No      | Yes   |

|          |   |   |   |   |   |   |     |     |     |
|----------|---|---|---|---|---|---|-----|-----|-----|
| Gdpd3    |   | x |   |   |   |   | Yes | No  | No  |
| Hpgds    |   | x |   |   |   |   | Yes | No  | Yes |
| Acsbg1   |   | x |   |   |   |   | Yes | No  | Yes |
| Acsm3    |   | x |   |   |   |   | Yes | No  | No  |
| Nox4     |   |   | x |   |   |   | Yes | No  | No  |
| Gucy1a2  |   |   | x |   |   |   | Yes | No  | No  |
| Ptprn    |   |   | x |   |   |   | Yes | No  | No  |
| Rgs4     |   |   |   | x |   |   | Yes | No  | Yes |
| Slc10a6  |   |   |   | x |   |   | Yes | No  | No  |
| Fgf9     |   |   |   |   |   | x | Yes | No  | No  |
| Slc30a4  |   |   |   | x |   |   | No  | Yes | No  |
| Slc9b1   |   |   |   | x |   |   | No  | Yes | No  |
| Oas1b    | x |   |   |   |   |   | No  | No  | Yes |
| Clec2d   | x |   |   |   |   |   | No  | No  | Yes |
| Gdap10   | x |   |   |   |   |   | No  | No  | Yes |
| Il18bp   | x |   |   |   |   |   | No  | No  | Yes |
| Lgals4   | x |   |   |   |   |   | No  | No  | Yes |
| Pisd-ps1 | x |   |   |   |   |   | No  | No  | Yes |
| Snhg20   | x |   |   |   |   |   | No  | No  | Yes |
| Alms1    |   | x |   |   |   |   | No  | No  | Yes |
| Echdc2   |   | x |   |   |   |   | No  | No  | Yes |
| Phka2    |   | x |   |   |   |   | No  | No  | Yes |
| Gabre    |   |   |   | x |   |   | No  | No  | Yes |
| Gabrr2   |   |   |   | x |   |   | No  | No  | Yes |
| Atg9b    |   |   |   |   | x |   | No  | No  | Yes |
| Spx      |   |   |   |   | x |   | No  | No  | Yes |

**Table S3. Biological process of interest for genes downregulated by a maternal HFHS diet (overall, female-specific and male-specific comparisons).** Biological processes determined by the DAVID analysis tool and the comparison when altered are shown for downregulated genes related to immune response, lipid or fatty acid metabolic process, response to hypoxia & ROS, iron transport, nutrients transport, and angiogenesis. Data are n = 12 per dietary group for overall and n = 6 per group for sex-specific comparisons.

|                  | Biological process related to: |                                       |                           |                |                     |              | Altered when comparing Ctrl vs HFHS: |         |       |
|------------------|--------------------------------|---------------------------------------|---------------------------|----------------|---------------------|--------------|--------------------------------------|---------|-------|
| Upregulated DEGs | Immune response                | Lipid or fatty acid metabolic process | Response to hypoxia & ROS | Iron transport | Nutrients transport | Angiogenesis | Overall                              | Females | Males |
| Chil3            | x                              |                                       |                           |                |                     |              | Yes                                  | Yes     | Yes   |
| Pla2g4a          | x                              | x                                     |                           |                |                     |              | Yes                                  | Yes     | Yes   |
| Slc9b2           |                                |                                       |                           | x              |                     |              | Yes                                  | Yes     | Yes   |
| Bdh2             |                                | x                                     |                           |                |                     |              | Yes                                  | Yes     | No    |
| Slc26a7          |                                |                                       |                           | x              |                     |              | Yes                                  | Yes     | No    |
| Slc6a14          |                                |                                       |                           | x              |                     |              | Yes                                  | Yes     | No    |
| Cd28             | x                              |                                       |                           |                |                     |              | Yes                                  | No      | No    |
| Rasgrp1          | x                              |                                       |                           |                |                     |              | Yes                                  | No      | Yes   |
| Tgtp1            | x                              |                                       |                           |                |                     |              | Yes                                  | No      | No    |
| Hamp             | x                              |                                       |                           | x              |                     |              | Yes                                  | No      | Yes   |
| Il1a             | x                              |                                       |                           |                |                     |              | Yes                                  | No      | Yes   |
| Snhg1            | x                              |                                       |                           |                |                     |              | Yes                                  | No      | Yes   |
| Apold1           |                                | x                                     | x                         |                | x                   | x            | Yes                                  | No      | Yes   |
| Cyb5r2           |                                | x                                     |                           |                |                     |              | Yes                                  | No      | Yes   |
| Gdpd3            |                                | x                                     |                           |                |                     |              | Yes                                  | No      | No    |

|          |   |   |   |   |   |   |     |     |     |
|----------|---|---|---|---|---|---|-----|-----|-----|
| Hpgds    |   | x |   |   |   |   | Yes | No  | Yes |
| Acsbg1   |   | x |   |   |   |   | Yes | No  | Yes |
| Acsm3    |   | x |   |   |   |   | Yes | No  | No  |
| Nox4     |   |   | x |   |   |   | Yes | No  | No  |
| Gucy1a2  |   |   | x |   |   |   | Yes | No  | No  |
| Ptpn     |   |   | x |   |   |   | Yes | No  | No  |
| Rgs4     |   |   |   | x |   |   | Yes | No  | Yes |
| Slc10a6  |   |   |   | x |   |   | Yes | No  | No  |
| Fgf9     |   |   |   |   |   | x | Yes | No  | No  |
| Slc30a4  |   |   |   | x |   |   | No  | Yes | No  |
| Slc9b1   |   |   |   | x |   |   | No  | Yes | No  |
| Oas1b    | x |   |   |   |   |   | No  | No  | Yes |
| Clec2d   | x |   |   |   |   |   | No  | No  | Yes |
| Gdap10   | x |   |   |   |   |   | No  | No  | Yes |
| Il18bp   | x |   |   |   |   |   | No  | No  | Yes |
| Lgals4   | x |   |   |   |   |   | No  | No  | Yes |
| Pisd-ps1 | x |   |   |   |   |   | No  | No  | Yes |
| Snhg20   | x |   |   |   |   |   | No  | No  | Yes |
| Alms1    |   | x |   |   |   |   | No  | No  | Yes |
| Echdc2   |   | x |   |   |   |   | No  | No  | Yes |
| Phka2    |   | x |   |   |   |   | No  | No  | Yes |
| Gabre    |   |   |   | x |   |   | No  | No  | Yes |
| Gabbr2   |   |   |   | x |   |   | No  | No  | Yes |
| Atg9b    |   |   |   |   | x |   | No  | No  | Yes |
| Spx      |   |   |   |   | x |   | No  | No  | Yes |

**Table S4. Genes differentially expressed by a HFHS diet for overall, female-specific and male-specific comparisons that are located on the X chromosome.**

| Gene ID             | Gene Symbol | Chromosome            | Direction of Change | Comparison |
|---------------------|-------------|-----------------------|---------------------|------------|
| ENSMUSG000000031380 | Vegfd       | X:164373378-164402650 | downregulated       | Overall    |
| ENSMUSG000000051228 | Nyx         | X:13466110-13489313   | downregulated       | Overall    |
| ENSMUSG000000059327 | Eda         | X:99975606-100400762  | downregulated       | Overall    |
| ENSMUSG000000087149 | Itih5l-ps   | X:150826972-150857053 | downregulated       | Overall    |
| ENSMUSG000000031089 | Slc6a14     | X:21714896-21742355   | upregulated         | Overall    |
| ENSMUSG000000031163 | Glod5       | X:8004200-8018492     | upregulated         | Overall    |
| ENSMUSG000000073062 | Zxdb        | X:94724569-94730187   | upregulated         | Overall    |
| ENSMUSG000000051228 | Nyx         | X:13466110-13489313   | downregulated       | Females    |
| ENSMUSG000000059327 | Eda         | X:99975606-100400762  | downregulated       | Females    |
| ENSMUSG000000031089 | Slc6a14     | X:21714896-21742355   | upregulated         | Females    |
| ENSMUSG000000079584 | Gm364       | X:57409154-57488767   | upregulated         | Females    |
| ENSMUSG000000031200 | Mtcp1       | X:75410444-75416588   | upregulated         | Males      |
| ENSMUSG000000031295 | Phka2       | X:160502166-160598878 | upregulated         | Males      |
| ENSMUSG000000031303 | Map3k15     | X:159988433-160123351 | upregulated         | Males      |
| ENSMUSG000000031340 | Gabre       | X:72255999-72274803   | upregulated         | Males      |
| ENSMUSG000000031362 | Xlr4c       | X:73233688-73243130   | upregulated         | Males      |
| ENSMUSG000000031380 | Vegfd       | X:164373378-164402650 | downregulated       | Males      |
| ENSMUSG000000034160 | Ogt         | X:101640060-101684351 | upregulated         | Males      |
| ENSMUSG000000055653 | Gpc3        | X:52272426-52613950   | downregulated       | Males      |
| ENSMUSG000000059327 | Eda         | X:99975606-100400762  | downregulated       | Males      |
| ENSMUSG000000067768 | Xlr4b       | X:73214333-73222453   | upregulated         | Males      |
| ENSMUSG000000073125 | Xlr3b       | X:73192207-73202930   | upregulated         | Males      |
| ENSMUSG000000085396 | Firre       | X:50555744-50635321   | upregulated         | Males      |
| ENSMUSG000000101603 | Gm28730     | X:53051194-53053159   | upregulated         | Males      |



**Table S5. Genes differentially expressed by a HFHS diet compared to an intrauterine inflammation model.**

Overlapped DEGs from Lien et al. 2020, and their direction of change. Genes differentially expressed in the placenta by a maternal HFHS diet (overall, female and male-specific comparisons) overlapped with the list of genes differentially expressed in response to intrauterine inflammation (50).

| Comparison | Gene    | Lien et al. 2020 |                     | Candia et al. 2023 |                     |
|------------|---------|------------------|---------------------|--------------------|---------------------|
|            |         | LogFC            | Direction of change | LogFC              | Direction of change |
| Overall    | Apoa2   | 0.4676           | Upregulated         | -1.664             | Downregulated       |
|            | Derl3   | -0.2909          | Downregulated       | -0.8214            | Downregulated       |
|            | Hnf4a   | 0.2383           | Upregulated         | -0.6725            | Downregulated       |
|            | Igfbp1  | 0.1945           | Upregulated         | -0.8751            | Downregulated       |
|            | Endou   | -0.2226          | Downregulated       | -0.6593            | Downregulated       |
|            | Igfbp6  | -0.4652          | Downregulated       | -0.9445            | Downregulated       |
|            | Scd2    | 0.3195           | Upregulated         | -0.8336            | Downregulated       |
|            | Ccdc184 | 1.249            | Upregulated         | -0.5979            | Downregulated       |
|            | Elovl4  | -0.2856          | Downregulated       | -0.8061            | Downregulated       |
|            | Abtb2   | 0.6324           | Upregulated         | -0.5853            | Downregulated       |
|            | Spata2l | -0.7153          | Downregulated       | -0.6037            | Downregulated       |
|            | Cdhr2   | 0.4082           | Upregulated         | -1.981             | Downregulated       |
|            | Thrsp   | -0.5856          | Downregulated       | -0.749             | Downregulated       |
|            | Cysrt1  | -0.308           | Downregulated       | -0.677             | Downregulated       |
|            | Asb10   | 0.3591           | Upregulated         | -0.6987            | Downregulated       |
|            | Pcp4l1  | -0.3033          | Downregulated       | -0.7501            | Downregulated       |
|            | Unc5cl  | 0.395            | Upregulated         | -0.9061            | Downregulated       |

|         |               |         |               |         |               |
|---------|---------------|---------|---------------|---------|---------------|
|         | Rarres1       | -0.2644 | Downregulated | -0.6824 | Downregulated |
|         | Spink2        | 0.0994  | Upregulated   | -0.7265 | Downregulated |
|         | Chst8         | 0.3231  | Upregulated   | -0.5981 | Downregulated |
|         | Itih5l-ps     | -0.3358 | Downregulated | -0.7817 | Downregulated |
|         | Gm6967        | -0.4597 | Downregulated | -0.8069 | Downregulated |
|         | Adora2b       | 1.2272  | Upregulated   | 0.5969  | Upregulated   |
|         | 4930412O13Rik | 0.3467  | Upregulated   | 0.8344  | Upregulated   |
|         | Il1a          | 1.6012  | Upregulated   | 0.9643  | Upregulated   |
|         | Slc10a6       | 0.6251  | Upregulated   | 0.7399  | Upregulated   |
|         | Ing4          | -0.2686 | Downregulated | 0.7233  | Upregulated   |
|         | Gdpd3         | 1.0079  | Upregulated   | 2.972   | Upregulated   |
|         | Slc6a14       | 0.3296  | Upregulated   | 0.5905  | Upregulated   |
|         | Rgs4          | 0.6455  | Upregulated   | 0.6297  | Upregulated   |
|         | Chil3         | -0.5241 | Downregulated | 1.416   | Upregulated   |
|         | Samd9l        | 1.2516  | Upregulated   | 0.6415  | Upregulated   |
|         | Hamp          | 1.1941  | Upregulated   | 1.18    | Upregulated   |
|         | Tgtp1         | 1.321   | Upregulated   | 0.9841  | Upregulated   |
|         | Gm15972       | -0.4264 | Downregulated | 0.6378  | Upregulated   |
|         | Apold1        | 0.9598  | Upregulated   | 0.8594  | Upregulated   |
|         | Gm20627       | -0.373  | Downregulated | 0.7379  | Upregulated   |
|         | D5Erttd605e   | -0.3257 | Downregulated | 0.6978  | Upregulated   |
| Females | Scd2          | 0.3195  | Upregulated   | -0.635  | Downregulated |
|         | Thrsp         | -0.5856 | Downregulated | -0.9754 | Downregulated |
|         | Pnoc          | -0.2869 | Downregulated | -2.585  | Downregulated |
|         | Slc6a14       | 0.3296  | Upregulated   | 0.7507  | Upregulated   |
|         | Chil3         | -0.5241 | Downregulated | 1.268   | Upregulated   |
| Males   | Ltbp1         | 0.3008  | Upregulated   | -0.6296 | Downregulated |
|         | Htra1         | 0.3239  | Upregulated   | -0.6936 | Downregulated |
|         | Slc5a1        | 0.3765  | Upregulated   | -1.662  | Downregulated |

|  |               |         |               |         |               |
|--|---------------|---------|---------------|---------|---------------|
|  | Slc9a5        | 0.3937  | Upregulated   | 0.6846  | Upregulated   |
|  | Wnt7b         | -0.2844 | Downregulated | -0.6233 | Downregulated |
|  | Endou         | -0.2226 | Downregulated | -0.6909 | Downregulated |
|  | Igfbp6        | -0.4652 | Downregulated | -0.9746 | Downregulated |
|  | Pgc           | -0.092  | Downregulated | -0.6118 | Downregulated |
|  | Zfp397        | -0.3159 | Downregulated | 0.6907  | Upregulated   |
|  | Cpn1          | 0.3036  | Upregulated   | -1.923  | Downregulated |
|  | Scd2          | 0.3195  | Upregulated   | -0.9842 | Downregulated |
|  | 4930412O13Rik | 0.3467  | Upregulated   | 1.449   | Upregulated   |
|  | Il1a          | 1.6012  | Upregulated   | 1.345   | Upregulated   |
|  | Echdc2        | 0.4017  | Upregulated   | 0.6956  | Upregulated   |
|  | Oas1b         | 0.7805  | Upregulated   | 0.7144  | Upregulated   |
|  | 1600015I10Rik | -0.5099 | Downregulated | 0.8993  | Upregulated   |
|  | Trpv6         | -0.2448 | Downregulated | -0.7122 | Downregulated |
|  | Clec2d        | 0.3596  | Upregulated   | 0.6639  | Upregulated   |
|  | Ing4          | -0.2686 | Downregulated | 1.082   | Upregulated   |
|  | Syt8          | 0.2537  | Upregulated   | 0.7586  | Upregulated   |
|  | Elovl4        | -0.2856 | Downregulated | -0.895  | Downregulated |
|  | Uba7          | 0.9647  | Upregulated   | 0.951   | Upregulated   |
|  | Ppip5k1       | 0.2791  | Upregulated   | 0.7134  | Upregulated   |
|  | Fam208b       | 0.2572  | Upregulated   | 0.5851  | Upregulated   |
|  | Ptgdr2        | -0.5465 | Downregulated | -0.603  | Downregulated |
|  | Cdhr2         | 0.4082  | Upregulated   | -2.572  | Downregulated |
|  | Creb3l3       | 0.3708  | Upregulated   | -1.15   | Downregulated |
|  | Cysrt1        | -0.308  | Downregulated | -0.6707 | Downregulated |
|  | Asb10         | 0.3591  | Upregulated   | -0.8802 | Downregulated |
|  | Rgs4          | 0.6455  | Upregulated   | 0.7965  | Upregulated   |
|  | A230050P20Rik | 0.6014  | Upregulated   | 0.6085  | Upregulated   |
|  | Bace2         | 0.2868  | Upregulated   | -0.7172 | Downregulated |

|  |               |         |               |         |               |
|--|---------------|---------|---------------|---------|---------------|
|  | Chil3         | -0.5241 | Downregulated | 1.599   | Upregulated   |
|  | 2010003K11Rik | 0.1909  | Upregulated   | -2.457  | Downregulated |
|  | Lgals2        | 0.2674  | Upregulated   | -1.132  | Downregulated |
|  | Pnoc          | -0.2869 | Downregulated | -1.972  | Downregulated |
|  | Samd9l        | 1.2516  | Upregulated   | 0.8596  | Upregulated   |
|  | Rarres1       | -0.2644 | Downregulated | -0.7834 | Downregulated |
|  | Hamp          | 1.1941  | Upregulated   | 1.234   | Upregulated   |
|  | Cx3cr1        | -0.2885 | Downregulated | -0.7852 | Downregulated |
|  | Spink2        | 0.0994  | Upregulated   | -0.8786 | Downregulated |
|  | 2010109I03Rik | 0.5219  | Upregulated   | 0.7922  | Upregulated   |
|  | Hsp25-ps1     | 0.8689  | Upregulated   | -0.6478 | Downregulated |
|  | Pisd-ps1      | -0.5627 | Downregulated | 0.6441  | Upregulated   |
|  | Apold1        | 0.9598  | Upregulated   | 0.947   | Upregulated   |
|  | Gm20627       | -0.373  | Downregulated | 0.9368  | Upregulated   |
|  | Gdap10        | 0.318   | Upregulated   | 1.103   | Upregulated   |
|  | Gm4673        | -0.3378 | Downregulated | 0.6196  | Upregulated   |

**Table S6. Genes differentially expressed by a HFHS diet related to biological processes of interest compared to an intrauterine inflammation model.**

Overlapped DEGs from Lian et al. 2020 and Candia et al. 2023, and their direction of change related to biological process of interest.

| Comparison | Gene           | Lien 2020 |                     | Candia 2023 |                     |
|------------|----------------|-----------|---------------------|-------------|---------------------|
|            |                | LogFC     | Direction of change | LogFC       | Direction of change |
| Overall    | <b>Il1a</b>    | 1.6012    | Upregulated         | 0.9643      | Upregulated         |
|            | <b>Slc10a6</b> | 0.6251    | Upregulated         | 0.7399      | Upregulated         |
|            | <b>Gdpd3</b>   | 1.0079    | Upregulated         | 2.972       | Upregulated         |
|            | <b>Slc6a14</b> | 0.3296    | Upregulated         | 0.5905      | Upregulated         |
|            | <b>Rgs4</b>    | 0.6455    | Upregulated         | 0.6297      | Upregulated         |
|            | Chil3          | -0.5241   | Downregulated       | 1.416       | Upregulated         |
|            | <b>Hamp</b>    | 1.1941    | Upregulated         | 1.18        | Upregulated         |
|            | <b>Tgtp1</b>   | 1.321     | Upregulated         | 0.9841      | Upregulated         |
|            | <b>Apold1</b>  | 0.9598    | Upregulated         | 0.8594      | Upregulated         |
|            | <b>Elovl4</b>  | -0.2856   | Downregulated       | -0.8061     | Downregulated       |
|            | <b>Thrsp</b>   | -0.5856   | Downregulated       | -0.749      | Downregulated       |
|            | Unc5cl         | 0.395     | Upregulated         | -0.9061     | Downregulated       |
|            | Scd2           | 0.3195    | Upregulated         | -0.8336     | Downregulated       |
| Females    | <b>Slc6a14</b> | 0.3296    | Upregulated         | 0.7507      | Upregulated         |
|            | Chil3          | -0.5241   | Downregulated       | 1.268       | Upregulated         |
|            | Scd2           | 0.3195    | Upregulated         | -0.635      | Downregulated       |
|            | <b>Thrsp</b>   | -0.5856   | Downregulated       | -0.9754     | Downregulated       |
| Males      | <b>Il1a</b>    | 1.6012    | Upregulated         | 1.345       | Upregulated         |
|            | <b>Echdc2</b>  | 0.4017    | Upregulated         | 0.6956      | Upregulated         |
|            | <b>Oas1b</b>   | 0.7805    | Upregulated         | 0.7144      | Upregulated         |
|            | <b>Clec2d</b>  | 0.3596    | Upregulated         | 0.6639      | Upregulated         |

|               |         |               |         |               |
|---------------|---------|---------------|---------|---------------|
| <b>Rgs4</b>   | 0.6455  | Upregulated   | 0.7965  | Upregulated   |
| Chil3         | -0.5241 | Downregulated | 1.599   | Upregulated   |
| <b>Hamp</b>   | 1.1941  | Upregulated   | 1.234   | Upregulated   |
| Pisd-ps1      | -0.5627 | Downregulated | 0.6441  | Upregulated   |
| <b>Apold1</b> | 0.9598  | Upregulated   | 0.947   | Upregulated   |
| <b>Gdap10</b> | 0.318   | Upregulated   | 1.103   | Upregulated   |
| <b>Wnt7b</b>  | -0.2844 | Downregulated | -0.6233 | Downregulated |
| Scd2          | 0.3195  | Upregulated   | -0.9842 | Downregulated |
| <b>Trpv6</b>  | -0.2448 | Downregulated | -0.7122 | Downregulated |
| <b>Elovl4</b> | -0.2856 | Downregulated | -0.895  | Downregulated |
| Lgals2        | 0.2674  | Upregulated   | -1.132  | Downregulated |
| <b>Cx3cr1</b> | -0.2885 | Downregulated | -0.7852 | Downregulated |
